# Supplementary material for: Highly Multiplexed Single-Cell In Situ RNA and DNA Analysis by Consecutive Hybridization
Source: Molecules. 2020 Oct 23;25(21):4900. doi: 10.3390/molecules25214900 (PMC7660199; doi:10.3390/molecules25214900)
Supplement: Supplementary file 1 [file molecules-25-04900-s001.xlsx]

## Sheet: Sheet1
RNA C-FISH					DNA C-FISH
Predecoding probes					Predecoding probes
GAPDH	5'->3'					5'->3'
	tcatccgatatggtgatccattttttcatccgatatggtgatccattttttaacggctgcccattcattt					5'-tcatccgatatggtgatccattttttctgttccttgctccttgctttctccatactc
	tcatccgatatggtgatccattttttcatccgatatggtgatccatttttggagaaatcgggccagctag					5'-tcatccgatatggtgatccatttttcttgaacaccttttccaactcaccgtgctggt
	tcatccgatatggtgatccattttttcatccgatatggtgatccattttttctaggaaaagcatcacccg					5'-tcatccgatatggtgatccatttttggcattctcttcaaacctccaggtattgtgta
	tcatccgatatggtgatccattttttcatccgatatggtgatccatttttcccaatacgaccaaatcaga					5'-tcatccgatatggtgatccatttttgttacagcataagatagaccgtaaaagccaac
	tcatccgatatggtgatccattttttcatccgatatggtgatccatttttcagagttaaaagcagccctg					5'-tcatccgatatggtgatccatttttcccagaagtcattgctaaagcaggaaggccca
	tcatccgatatggtgatccattttttcatccgatatggtgatccatttttgggtcattgatggcaacaat					5'-tcatccgatatggtgatccatttttatgatggcaatcctggatgagtgttttagtct
	tcatccgatatggtgatccattttttcatccgatatggtgatccatttttaccatgtagttgaggtcaat					5'-tcatccgatatggtgatccattttttctgccattagctgtgggtcgatcgtgtccta
	tcatccgatatggtgatccattttttcatccgatatggtgatccatttttcatgggtggaatcatattgg					5'-tcatccgatatggtgatccattttttagtgtcccagatagcagagaggctagtgtga
	tcatccgatatggtgatccattttttcatccgatatggtgatccatttttttgacggtgccatggaattt					5'-tcatccgatatggtgatccatttttactgagtgtgagtttccagcccagggtgctgg
	tcatccgatatggtgatccattttttcatccgatatggtgatccatttttcattgatgacaagcttcccg					5'-tcatccgatatggtgatccatttttctcaagagccctattcatgggagtggactctt
	tcatccgatatggtgatccattttttcatccgatatggtgatccatttttctggaagatggtgatgggat					5'-tcatccgatatggtgatccatttttctgcagagcccaagataagagatggccctgag
	tcatccgatatggtgatccattttttcatccgatatggtgatccatttttcttgattttggagggatctc					5'-tcatccgatatggtgatccatttttgtcatactgtgcctaatgaatcactggatata
	tcatccgatatggtgatccattttttcatccgatatggtgatccatttttcagtggactccacgacgtac					5'-tcatccgatatggtgatccatttttagctcaacccaggagaaggatttgttcttgga
	tcatccgatatggtgatccattttttcatccgatatggtgatccatttttttctccatggtggtgaagac					5'-tcatccgatatggtgatccattttttttatagggagtcctgactattcttgttctgt
	tcatccgatatggtgatccattttttcatccgatatggtgatccatttttagagatgatgacccttttgg					5'-tcatccgatatggtgatccatttttccttcagtcttcaactcttgatacctgttaat
	tcatccgatatggtgatccattttttcatccgatatggtgatccatttttatgacgaacatgggggcatc					5'-tcatccgatatggtgatccattttttataaacataggcatgctcaagttaagtgcct
	tcatccgatatggtgatccattttttcatccgatatggtgatccatttttgtcatacttctcatggttca					5'-tcatccgatatggtgatccatttttagggttcaaacttggtggtgtccaggtagcta
	tcatccgatatggtgatccattttttcatccgatatggtgatccatttttattgctgatgatcttgaggc					5'-tcatccgatatggtgatccatttttacaaagcacctaattgggaaacacatggctct
	tcatccgatatggtgatccattttttcatccgatatggtgatccatttttctaagcagttggtggtgcag					5'-tcatccgatatggtgatccatttttaatagcttcagaagacagtaatgcagcatgag
	tcatccgatatggtgatccattttttcatccgatatggtgatccatttttagttgtcatggatgaccttg					5'-tcatccgatatggtgatccatttttcttagcacattggttactgaggaccagaaggt
	tcatccgatatggtgatccattttttcatccgatatggtgatccatttttcatgagtccttccacgatac					5'-tcatccgatatggtgatccatttttgcagggaactaatacagtattacctgctttga
	tcatccgatatggtgatccattttttcatccgatatggtgatccatttttcagtgatggcatggactgtg					5'-tcatccgatatggtgatccattttttcttaatgcaggaagttgtacaaatgcctcca
	tcatccgatatggtgatccattttttcatccgatatggtgatccattttttagaggcagggatgatgttc					5'-tcatccgatatggtgatccatttttgtgctgtaacctctcaccatgtttaaggttgc
	tcatccgatatggtgatccattttttcatccgatatggtgatccattttttcagctcagggatgaccttg					5'-tcatccgatatggtgatccattttttcatatttgacctgaatcttagaacctagcca
	tcatccgatatggtgatccattttttcatccgatatggtgatccatttttcactgacacgttggcagtgg					5'-tcatccgatatggtgatccattttttcaaaccaatcataggaaagcagcagtgcagt
	tcatccgatatggtgatccattttttcatccgatatggtgatccatttttttggcaggtttttctagacg					5'-tcatccgatatggtgatccatttttcattaggtggctgagtccaaaatgtcctcatc
	tcatccgatatggtgatccattttttcatccgatatggtgatccatttttcaccttcttgatgtcatcat					5'-tcatccgatatggtgatccatttttaggaagtatgtatgttgggagcttctgggctc
	tcatccgatatggtgatccattttttcatccgatatggtgatccatttttgctgttgaagtcagaggaga					5'-tcatccgatatggtgatccatttttccaggacagctgtgccagaactgccctgtgtg
	tcatccgatatggtgatccattttttcatccgatatggtgatccatttttcgtcaaaggtggaggagtgg					5'-tcatccgatatggtgatccatttttggtgtcattatgtgtcggttttctcaactata
	tcatccgatatggtgatccattttttcatccgatatggtgatccatttttaaagtggtcgttgagggcaa					5'-tcatccgatatggtgatccatttttggattgtccatattatcatccatctgttaggt
	tcatccgatatggtgatccattttttcatccgatatggtgatccatttttgtcataccaggaaatgagct					5'-tcatccgatatggtgatccatttttgggtttcaaatgattcacaagttttccagtca
	tcatccgatatggtgatccattttttcatccgatatggtgatccattttttgttgctgtagccaaattcg					5'-tcatccgatatggtgatccattttttgttagcatgaggaatcagatacaaggtttga
	tcatccgatatggtgatccattttttcatccgatatggtgatccatttttcagtgagggtctctctcttc					5'-tcatccgatatggtgatccatttttactgtgtgtaaattacaggagggaccttaaat
	tcatccgatatggtgatccattttttcatccgatatggtgatccatttttaactgtgaggaggggagatt					5'-tcatccgatatggtgatccatttttgagagctggtaatacaaggtagccagaggtct
	tcatccgatatggtgatccattttttcatccgatatggtgatccatttttctcttcaaggggtctacatg					5'-tcatccgatatggtgatccatttttcgactagattcaaacatgtttcctttccttgg
	tcatccgatatggtgatccattttttcatccgatatggtgatccatttttatggtacatgacaaggtgcg					5'-tcatccgatatggtgatccatttttagtcacatgtgatactgtgtattagtgatggg
	tcatccgatatggtgatccattttttcatccgatatggtgatccatttttttaactggttgagcacaggg					5'-tcatccgatatggtgatccattttttgactgccctggtgaatgtgagatgtctggac
						5'-tcatccgatatggtgatccatttttgcagctcagagtggcctttgacagcataaagc
						5'-tcatccgatatggtgatccatttttgcgtatgactgacatcacttccatcattttgg
Ki67	gtctttacagatgtctgcggtttttgtctttacagatgtctgcggttttttgcattaccagagactttct					5'-tcatccgatatggtgatccatttttgtggtgtcagtacttctggcagtggctatgtg
	gtctttacagatgtctgcggtttttgtctttacagatgtctgcggtttttggcttataaccaagctttgt					5'-tcatccgatatggtgatccatttttgcttgtgtgcagggatgacttaaaggaagtct
	gtctttacagatgtctgcggtttttgtctttacagatgtctgcggttttttggagttttcctaggactag					5'-tcatccgatatggtgatccatttttgcctgtgactaagatgaaggtaccttcttagc
	gtctttacagatgtctgcggtttttgtctttacagatgtctgcggttttttaggaacctctgtctgagat					5'-tcatccgatatggtgatccattttttgtgggaaacattcctcacctggatcatcctt
	gtctttacagatgtctgcggtttttgtctttacagatgtctgcggtttttagacactctctttgaaggca					5'-tcatccgatatggtgatccatttttcttgagtccaatgcccaacacatcagatctgg
	gtctttacagatgtctgcggtttttgtctttacagatgtctgcggtttttgttcattgacctttgaggac					5'-tcatccgatatggtgatccatttttggctctctccaaatgatagtttgtaagatgtc
	gtctttacagatgtctgcggtttttgtctttacagatgtctgcggtttttcgtggcctgtactaaattga					5'-tcatccgatatggtgatccattttttgctgttagtgtctgcagtgggaaatggtgac
	gtctttacagatgtctgcggtttttgtctttacagatgtctgcggtttttagttgttgagcactctgtag					5'-tcatccgatatggtgatccatttttcaatgttgccctagtgtctatatagaccttgc
	gtctttacagatgtctgcggtttttgtctttacagatgtctgcggttttttctaatacactgccgtctta					5'-tcatccgatatggtgatccatttttgtgtggtaaagggccgggtattgggaagctga
	gtctttacagatgtctgcggtttttgtctttacagatgtctgcggttttttgtttgcagtggatactgtt					5'-tcatccgatatggtgatccatttttctgacttctcagctctgagcaaggcatttcag
	gtctttacagatgtctgcggtttttgtctttacagatgtctgcggtttttgtagcttctgtatattcctg					5'-tcatccgatatggtgatccatttttcctgcagaatctgaaacttgagcatttacctg
	gtctttacagatgtctgcggtttttgtctttacagatgtctgcggtttttcgtgtctttcatgagttctg					5'-tcatccgatatggtgatccatttttatcctcaggtttcaaatgacatacatgatgga
	gtctttacagatgtctgcggtttttgtctttacagatgtctgcggtttttctggttgtaatgactggcag					5'-tcatccgatatggtgatccatttttgccagcttggtcagaaagtttcagcttcatat
	gtctttacagatgtctgcggtttttgtctttacagatgtctgcggttttttcatcagtcattgattcctc					5'-tcatccgatatggtgatccattttttggatgcttcattgtaagaggcctgtcctgtg
	gtctttacagatgtctgcggtttttgtctttacagatgtctgcggttttttttcctgatacttctcttgg					5'-tcatccgatatggtgatccattttttgttcttctagatgtctgtggcactccctgag
	gtctttacagatgtctgcggtttttgtctttacagatgtctgcggtttttctgatggcattagattcctg					5'-tcatccgatatggtgatccatttttaaatgtctacacatcctgtcttccctgaggag
	gtctttacagatgtctgcggtttttgtctttacagatgtctgcggtttttcttcacctactgatggttta					5'-tcatccgatatggtgatccatttttaggtatgtcttgggtcactttacagactggat
	gtctttacagatgtctgcggtttttgtctttacagatgtctgcggtttttctgagacttctcttggactg					5'-tcatccgatatggtgatccatttttcttctccatgatgttcaaatgggagaataaac
	gtctttacagatgtctgcggtttttgtctttacagatgtctgcggttttttcctgagtgcgaagaattct					5'-tcatccgatatggtgatccatttttgaaatctaatttcctcaaggtagctcctaggg
	gtctttacagatgtctgcggtttttgtctttacagatgtctgcggttttttcgttagtcattgattcctc					5'-tcatccgatatggtgatccattttttgctgtcttcactttgaagaattcttgaccac
	gtctttacagatgtctgcggtttttgtctttacagatgtctgcggttttttgtgacttggtgtctggaag					5'-tcatccgatatggtgatccatttttttgtgatacagcttgcaactccacaccctggt
	gtctttacagatgtctgcggtttttgtctttacagatgtctgcggtttttagctctgtaggatactttgg					5'-tcatccgatatggtgatccatttttcaggacattgtactgcaggaattggaatctga
	gtctttacagatgtctgcggtttttgtctttacagatgtctgcggtttttgtgttgatgtctttctcttc					5'-tcatccgatatggtgatccatttttttgtaggttcctctatgtgctgcttttccaga
	gtctttacagatgtctgcggtttttgtctttacagatgtctgcggttttttctattgctgccaggtaaat					5'-tcatccgatatggtgatccatttttgatcttctaatcacctcccagggtctggctgg
	gtctttacagatgtctgcggtttttgtctttacagatgtctgcggttttttttccttacgagtttgtagc					5'-tcatccgatatggtgatccatttttctaatgcacgtgactaatccttagactgctta
	gtctttacagatgtctgcggtttttgtctttacagatgtctgcggttttttggtgtctggaaaagctctc					5'-tcatccgatatggtgatccatttttgatgaccaagtgggattgaacttctgtccggt
	gtctttacagatgtctgcggtttttgtctttacagatgtctgcggttttttgattgcggagatttgcaga					5'-tcatccgatatggtgatccattttttcaatgacttcttagggtacccttgaaggagc
	gtctttacagatgtctgcggtttttgtctttacagatgtctgcggtttttgtgttgatgtctttctcttc					5'-tcatccgatatggtgatccatttttcacagcagtccatattcagttagctctcatat
	gtctttacagatgtctgcggtttttgtctttacagatgtctgcggtttttgtgattttgtcatcggtcat					5'-tcatccgatatggtgatccattttttccatctgtaaactaggatgagtagttttccc
	gtctttacagatgtctgcggtttttgtctttacagatgtctgcggtttttaggatatcttgagtcgttgc					5'-tcatccgatatggtgatccatttttggtttgagctgataagacatagaagtactaca
	gtctttacagatgtctgcggtttttgtctttacagatgtctgcggtttttctggaagagctctttcaagc					5'-tcatccgatatggtgatccatttttaggatgggagcctgagtcaactggttttgtaa
	gtctttacagatgtctgcggtttttgtctttacagatgtctgcggtttttctgagacttctcttggactg					5'-tcatccgatatggtgatccatttttgctacatgctcttgcttccttcattgttcttg
	gtctttacagatgtctgcggtttttgtctttacagatgtctgcggtttttctactgatggtgttcgtttc					5'-tcatccgatatggtgatccatttttagtgcttatgcctttgtggttctcacagcacc
	gtctttacagatgtctgcggtttttgtctttacagatgtctgcggttttttcatcagtcattgattcctc					5'-tcatccgatatggtgatccattttttgagcagttctaaaccaagttcaagttactag
	gtctttacagatgtctgcggtttttgtctttacagatgtctgcggtttttccttaaacgctttgatgctc					5'-tcatccgatatggtgatccatttttccatgagctcagtctctaaggcccggtaacat
	gtctttacagatgtctgcggtttttgtctttacagatgtctgcggtttttgcacgttgcttcaatacttt					5'-tcatccgatatggtgatccatttttgacttgggttaattagccttctagttgaaggt
	gtctttacagatgtctgcggtttttgtctttacagatgtctgcggttttttttgcagattccttcaatgc					5'-tcatccgatatggtgatccatttttggagtctgtagaacacctttcctatggagtct
						5'-tcatccgatatggtgatccatttttttccacggcaccctcctaccaaggctcttgca
						5'-tcatccgatatggtgatccatttttggcagcagcttagaaggccaagacttagctgc
Decoding probes						5'-tcatccgatatggtgatccatttttcttgcagtagtcaagcatgacataccctattt
GAPDH						5'-tcatccgatatggtgatccatttttagctgtccatgaatttggaagtgatgtccctg
cycle1	5'-Quasar 570-tggatcaccatatcggatgatttttggctatgtccgtaacactcctttttggctatgtccgtaacactcc					5'-tcatccgatatggtgatccatttttaagtaccatggatgtgtataggctcctgagtc
cycle2	5'-Cy5-gaaccatggtacctgagatctttttgaaccatggtacctgagatctttttggagtgttacggacatagcc					5'-tcatccgatatggtgatccattttttctccttccctctggcacataggtatgttcca
cycle3	5'-Quasar 570-gatctcaggtaccatggttctttttcgtccagattatgtttctcctttttcgtccagattatgtttctcc					5'-tcatccgatatggtgatccatttttaatagtgacccaacgagatctcctgtgaaatg
cycle4	5'-Cy5-cagcttagaatagaacattgtttttcagcttagaatagaacattgtttttggagaaacataatctggacg					5'-tcatccgatatggtgatccatttttagaccaggagagttaattaattacctgaggac
cycle5	5'-Quasar 570-caatgttctattctaagctgtttttctggatgatgttctctcatctttttctggatgatgttctctcatc					5'-tcatccgatatggtgatccatttttgtatacttctggccttctcaggagtaagcaga
cycle6	5'-Cy5-gctcaagtgttggtgaaggttttttgctcaagtgttggtgaaggttttttgatgagagaacatcatccag					5'-tcatccgatatggtgatccatttttaccctcgatgaggaggtttggaaagaatggat
cycle7	5'-Quasar 570-accttcaccaacacttgagctttttatagccctggacatgaacgttttttatagccctggacatgaacgt					5'-tcatccgatatggtgatccatttttgttgactctgtacttaatgtcagaagtggtgg
cycle8	5'-Cy5-cgtacagaggtagcaagggatttttcgtacagaggtagcaagggatttttacgttcatgtccagggctat					5'-tcatccgatatggtgatccatttttcaaagataccacctgtcatgcaacatatatgt
cycle9	5'-Quasar 570-tcccttgctacctctgtacgtttttcgatgcatcaggtacccagttttttcgatgcatcaggtacccagt					5'-tcatccgatatggtgatccatttttactgtcgtgatgtggaactccaaaaggtgaat
cycle10	5'-Cy5-gatggtcgtagtgtggcacatttttgatggtcgtagtgtggcacatttttactgggtacctgatgcatcg					5'-tcatccgatatggtgatccatttttatgcagaatgtcatcccttccatacttggcag
cycle11	5'-Quasar 570-tgtgccacactacgaccatctttttatgagtcttccagtcgtagttttttatgagtcttccagtcgtagt					5'-tcatccgatatggtgatccatttttttgatttcgttaccttgaaccagtggccaaag
cycle12	5'-Cy5-tcacgtaatgttctccacgattttttcacgtaatgttctccacgatttttactacgactggaagactcat					5'-tcatccgatatggtgatccatttttttgacatttgtgctttaggaccatactaggat
cycle13	5'-Quasar 570-tcgtggagaacattacgtgatttttcttgctatcttccagcgaagtttttcttgctatcttccagcgaag					5'-tcatccgatatggtgatccatttttcattaaacatgagcccttaaagcagcagttgc
cycle14	5'-Cy5-tagttgaaggagtgctcgtgttttttagttgaaggagtgctcgtgtttttcttcgctggaagatagcaag					5'-tcatccgatatggtgatccatttttgagcaggttatctttattggcacaaatgttac
cycle15	5'-Quasar 570-cacgagcactccttcaactatttttcacttcgtcatggagcatgatttttcacttcgtcatggagcatga					5'-tcatccgatatggtgatccatttttgttgctctaggagaactggagtcctagcccag
cycle16	5'-Cy5-tcatgctccatgacgaagtg					5'-tcatccgatatggtgatccatttttacaggccaaggagttgtgacccattagctttg
						5'-tcatccgatatggtgatccatttttgtgcatggctaagtcattagcttaaccattgc
Ki67						5'-tcatccgatatggtgatccatttttgagttcccagcagcaaccacagggagggccag
cycle1	5'-Cy5-ccgcagacatctgtaaagactttttccgatgttgacggactaatctttttccgatgttgacggactaatc					5'-tcatccgatatggtgatccatttttttgtcgcatgaacatgccacatctgtccacca
cycle2	5'-Quasar 570-tagtagttcagacgccgttattttttagtagttcagacgccgttatttttgattagtccgtcaacatcgg					5'-tcatccgatatggtgatccattttttgagaattgtcttcccagaagggtaggtcctt
cycle3	5'-Cy5-taacggcgtctgaactactatttttccgtacctagatacactcaatttttccgtacctagatacactcaa
cycle4	5'-Quasar 570-ccaggcaatatggtggtacatttttccaggcaatatggtggtacatttttttgagtgtatctaggtacgg
cycle5	5'-Cy5-tgtaccaccatattgcctggtttttcgtgaagcttgagtggaatctttttcgtgaagcttgagtggaatc				Decoding probes
cycle6	5'-Quasar 570-gtgtgaggcgctagagcatatttttgtgtgaggcgctagagcatatttttgattccactcaagcttcacg				cycle1	5'-Alexa 488-tggatcaccatatcggatgatttttggctatgtccgtaacactcctttttggctatgtccgtaacactcc
cycle7	5'-Cy5-tatgctctagcgcctcacactttttggtatggcacgcctaatctgtttttggtatggcacgcctaatctg				cycle2	5'-Cy5-gaaccatggtacctgagatctttttgaaccatggtacctgagatctttttggagtgttacggacatagcc
cycle8	5'-Quasar 570-atctccagtggcatccttcttttttatctccagtggcatccttcttttttcagattaggcgtgccatacc				cycle3	5'-Quasar 570-gatctcaggtaccatggttctttttcgtccagattatgtttctcctttttcgtccagattatgtttctcc
cycle9	5'-Cy5-agaaggatgccactggagattttttggtaactgcgcatagttggctttttggtaactgcgcatagttggc				cycle4	5'-Alexa 488-cagcttagaatagaacattgtttttcagcttagaatagaacattgtttttggagaaacataatctggacg
cycle10	5'-Quasar 570-ggtacagtaagtgagaatcctttttggtacagtaagtgagaatcctttttgccaactatgcgcagttacc				cycle5	5'-Cy5-caatgttctattctaagctgtttttctggatgatgttctctcatctttttctggatgatgttctctcatc
cycle11	5'-Cy5-ggattctcacttactgtacctttttgccaccttaacacgcgatgatttttgccaccttaacacgcgatga				cycle6	5'-Quasar 570-gctcaagtgttggtgaaggttttttgctcaagtgttggtgaaggttttttgatgagagaacatcatccag
cycle12	5'-Quasar 570-cattgatcttggtgctgctgtttttcattgatcttggtgctgctgttttttcatcgcgtgttaaggtggc				cycle7	5'-Cy5 570-accttcaccaacacttgagctttttatagccctggacatgaacgttttttatagccctggacatgaacgt
cycle13	5'-Cy5-cagcagcaccaagatcaatgtttttgctattacgagcgcttggattttttgctattacgagcgcttggat				cycle8	5'-Quasar 570-cgtacagaggtagcaagggatttttcgtacagaggtagcaagggatttttacgttcatgtccagggctat
cycle14	5'-Quasar 570-tatgttgtgccttacgcctcttttttatgttgtgccttacgcctctttttatccaagcgctcgtaatagc				cycle9	5'-Cy5-tcccttgctacctctgtacgtttttcgatgcatcaggtacccagttttttcgatgcatcaggtacccagt
cycle15	5'-Cy5-gaggcgtaaggcacaacatatttttttaaccgaactgacggccattttttttaaccgaactgacggccat
cycle16	5'-Quasar 570-atggccgtcagttcggttaa
